# Supplementary material
Source: Springer Nature journal article supplement (https://www.springermedizin.de/resource/supplementary/13054_2010_8855_MOESM2_ESM.pdf/9732766)

Microvascular flow index of small vessels

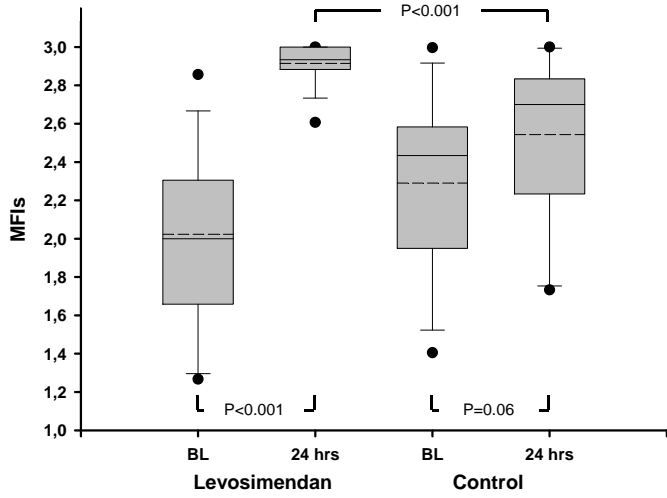

Microvascular flow index of medium vessels

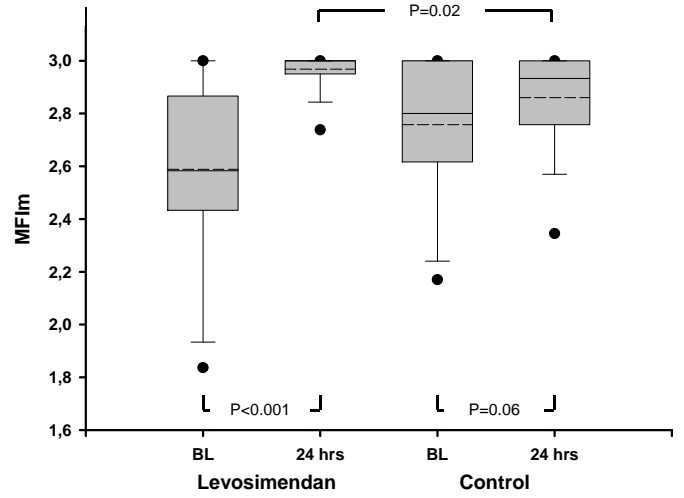

Vessel density

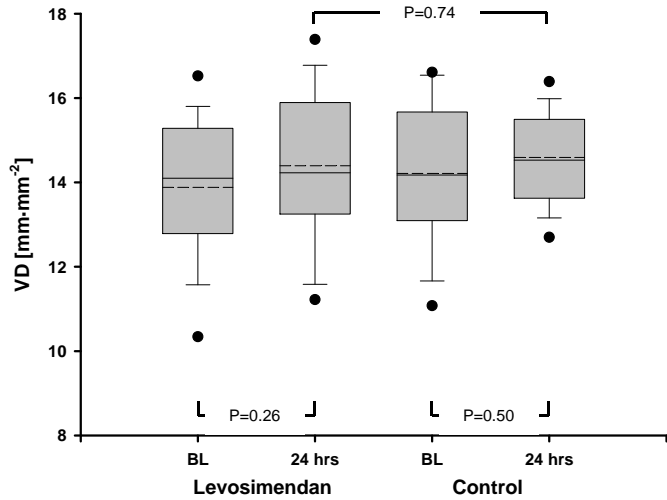

Perfused vessel density

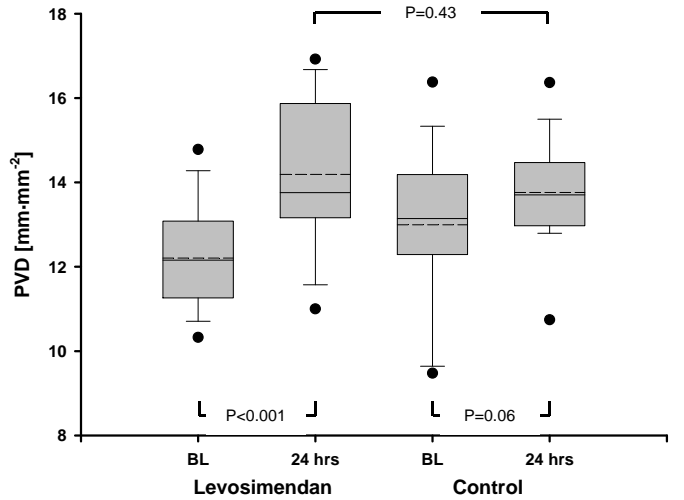

De Backer score

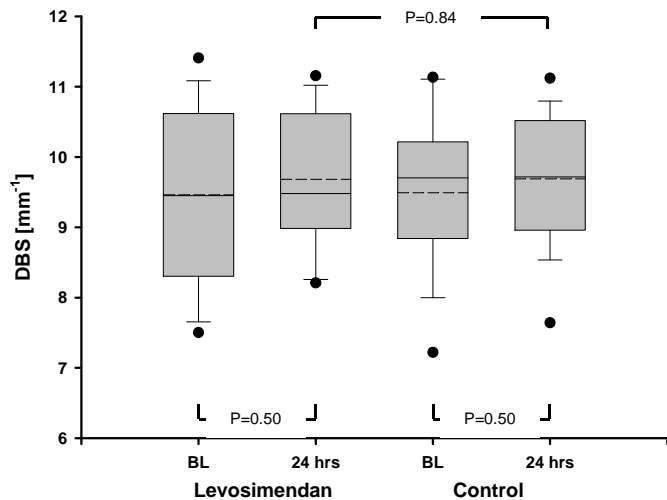

Heterogeneity index

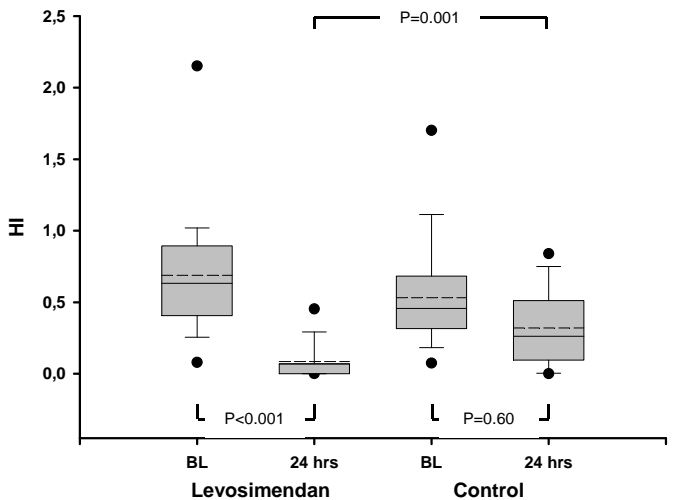

Supplement: MOESM2 [file 9732766]
